# Supplementary material
Source: PubMed Central journal article supplement (PMC4210334)
Supplement: pnas.201413135SI.pdf [file pnas.201413135SI.pdf]

# Supporting Information

van der Vinne et al. 10.1073/pnas.1413135111

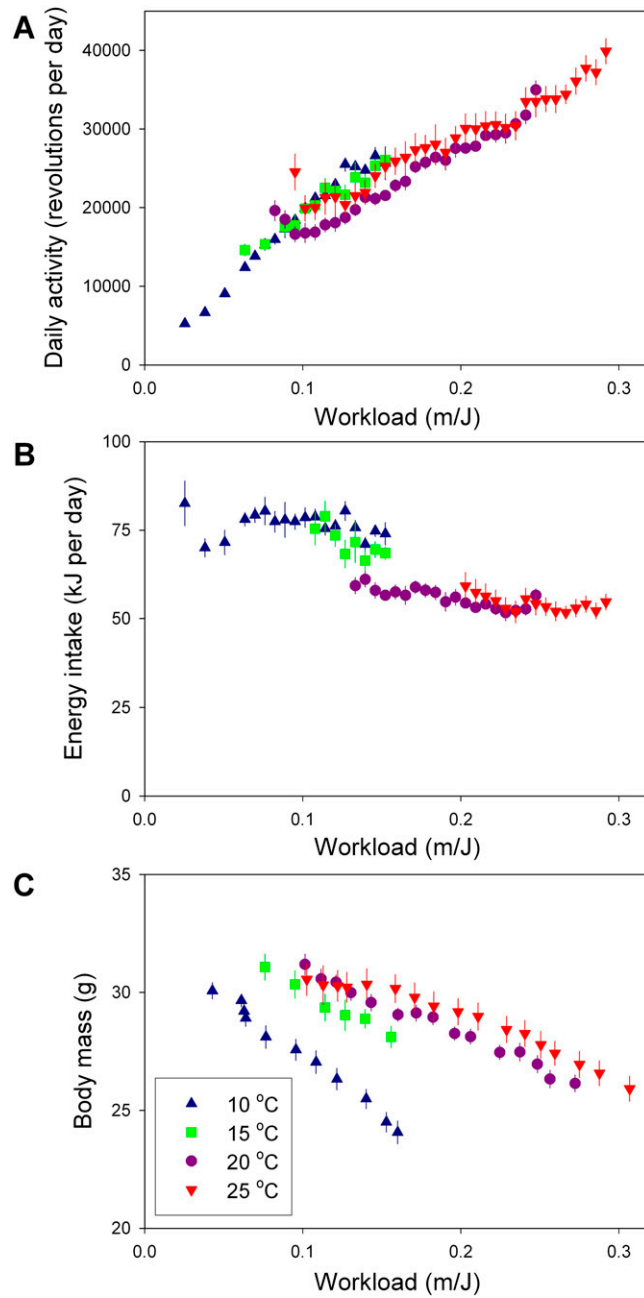

**Fig. S1.** Daily activity levels, energy intake and body mass per WFF workload for different  $T_a$ s. (A) Daily activity increases with WFF workload at all different  $T_a$ s. (B) Daily energy intake depends on  $T_a$  and decreases slightly during the WFF protocol although daily energy intake remains roughly constant with workload due to the increase in daily activity. Only days on which mice ate all available food pellets are included in analysis. (C) Body mass decreases during the WFF protocol, indicating an overall negative energy balance during the WFF protocol at all  $T_a$ s.





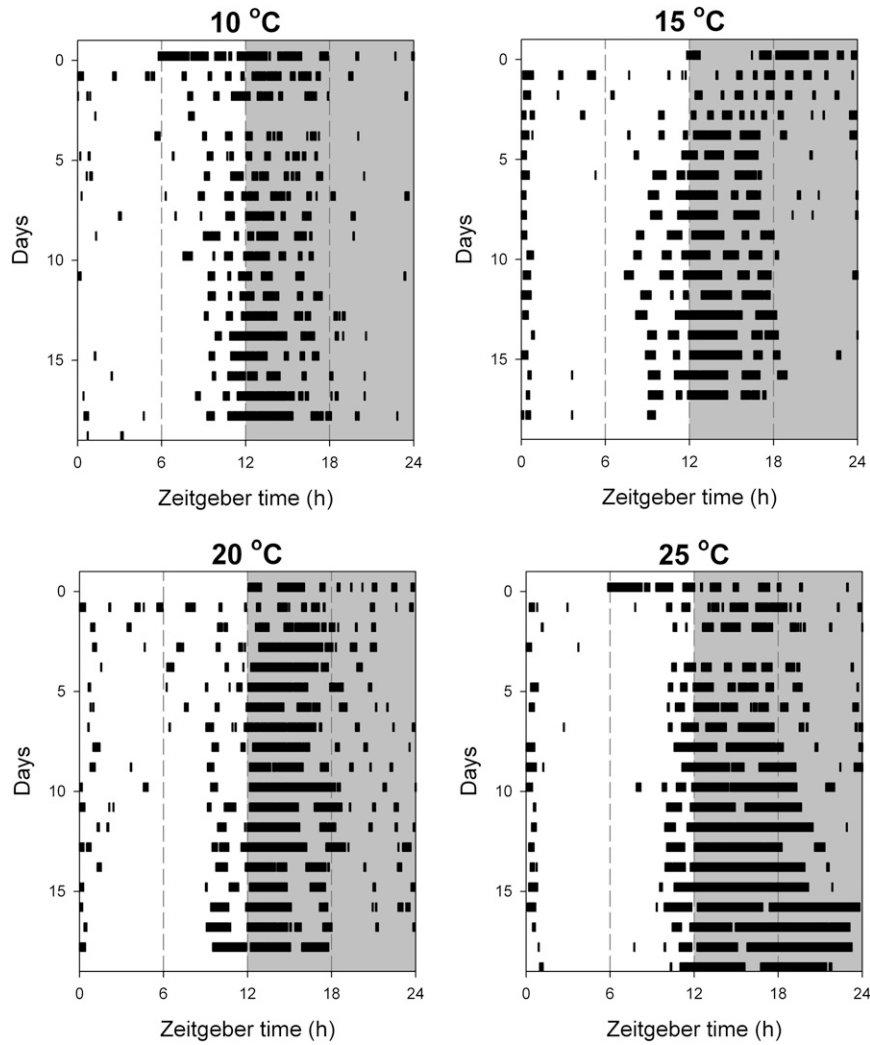

**Fig. 55.** Representative actograms of ad libitum fed mice housed in different ambient temperatures ( $T_a$ s). Activity is plotted as a function of time of day with subsequent days being plotted under each other, white–gray background indicates the LD cycle. Increasing  $T_a$  decreases the daytime activity fraction, as shown in Fig. 1A.

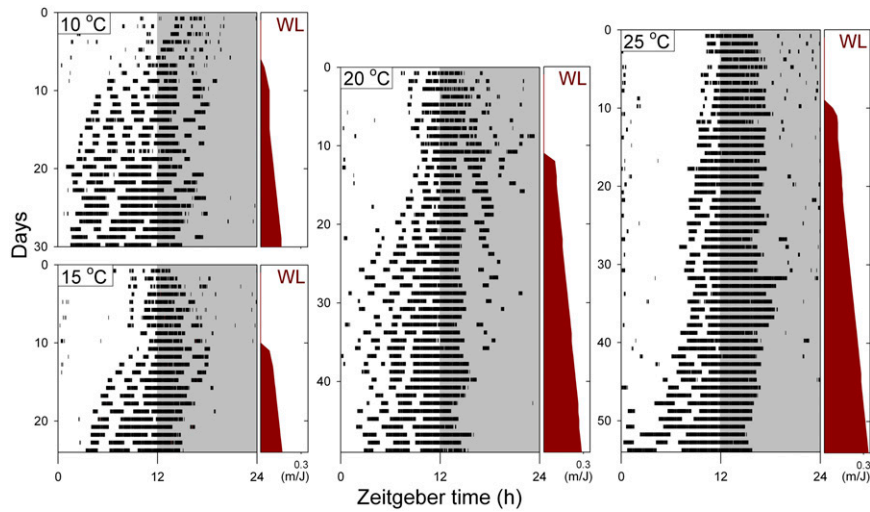

**Fig. 56.** Representative actograms of mice undergoing the working-for-food (WFF) protocol at different  $T_a$ s. Activity is plotted as a function of time of day with subsequent days being plotted under each other, white–gray background indicates the LD cycle. (Right) The WFF workload in red. Mice become diurnal at lower WFF workloads at lower  $T_a$ s, as shown in Fig. 1B.

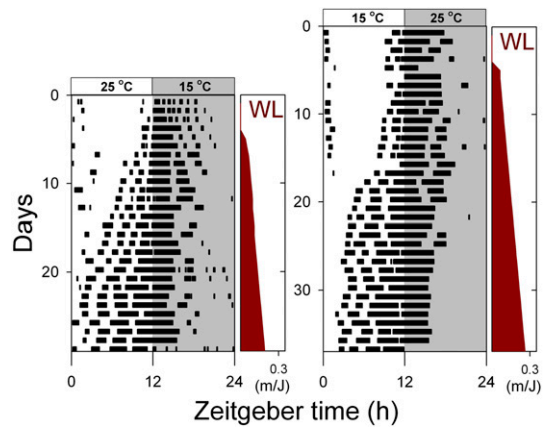

**Fig. 57.** Mice under work for food protocol become diurnal irrespective of the phase of the temperature cycle. Representative actograms of mice undergoing the WFF protocol in temperature cycles in phase (25–15 °C) and in antiphase (15–25 °C) with the LD cycle. (*Right*) The WFF workload in red. Both mice housed in a temperature cycle in phase and in antiphase to the LD cycle become diurnal in response to the WFF protocol, as shown in Fig. 1C.
